# Supplementary material for: A Dynamic View of ATP-coupled Functioning Cycle of Hsp90 N-terminal Domain
Source: PubMed Central journal article supplement (PMC4394755; doi:10.1038/srep09542), 2015-04-13
Supplement: srep09542-s1.pdf [file srep09542-s1.pdf]

## Supporting information

### A Dynamic View of ATP-coupled Functioning Cycle of Hsp90 N-terminal Domain

Huaqun Zhang<sup>1, #, ¶</sup>, Chen Zhou<sup>1, #</sup>, Wuyan Chen<sup>2</sup>,  
Yechun Xu<sup>2</sup>, Yanhong Shi<sup>1</sup>, Yi Wen<sup>1, \*</sup>, Naixia Zhang<sup>1, 3, \*\*</sup>

1 Department of Analytical Chemistry, Shanghai Institute of Materia Medica, Chinese Academy of Sciences, Shanghai 201203, P. R. China

2 CAS Key Laboratory of Receptor Research, Drug Discovery and Design Center, Shanghai Institute of Materia Medica, Chinese Academy of Sciences, Shanghai 201203, P. R. China

3 State Key Laboratory of Drug Research, Shanghai Institute of Materia Medica, Chinese Academy of Sciences, Shanghai 201203, P. R. China

¶ Current address: College of Arts and Science, Miami University, Oxford, OH 45056, USA

# These authors contributed equally to this work.

\* Corresponding author, Tel: (86) 21-50806600 ext. 3121.

\*\* Corresponding author, Tel: (86) 21-50806036.

E-mail address: [wenyi1984112@simc.ac.cn](mailto:wenyi1984112@simc.ac.cn) (Y. Wen); [nxzhang@mail.shcnc.ac.cn](mailto:nxzhang@mail.shcnc.ac.cn) (N-X. Zhang).

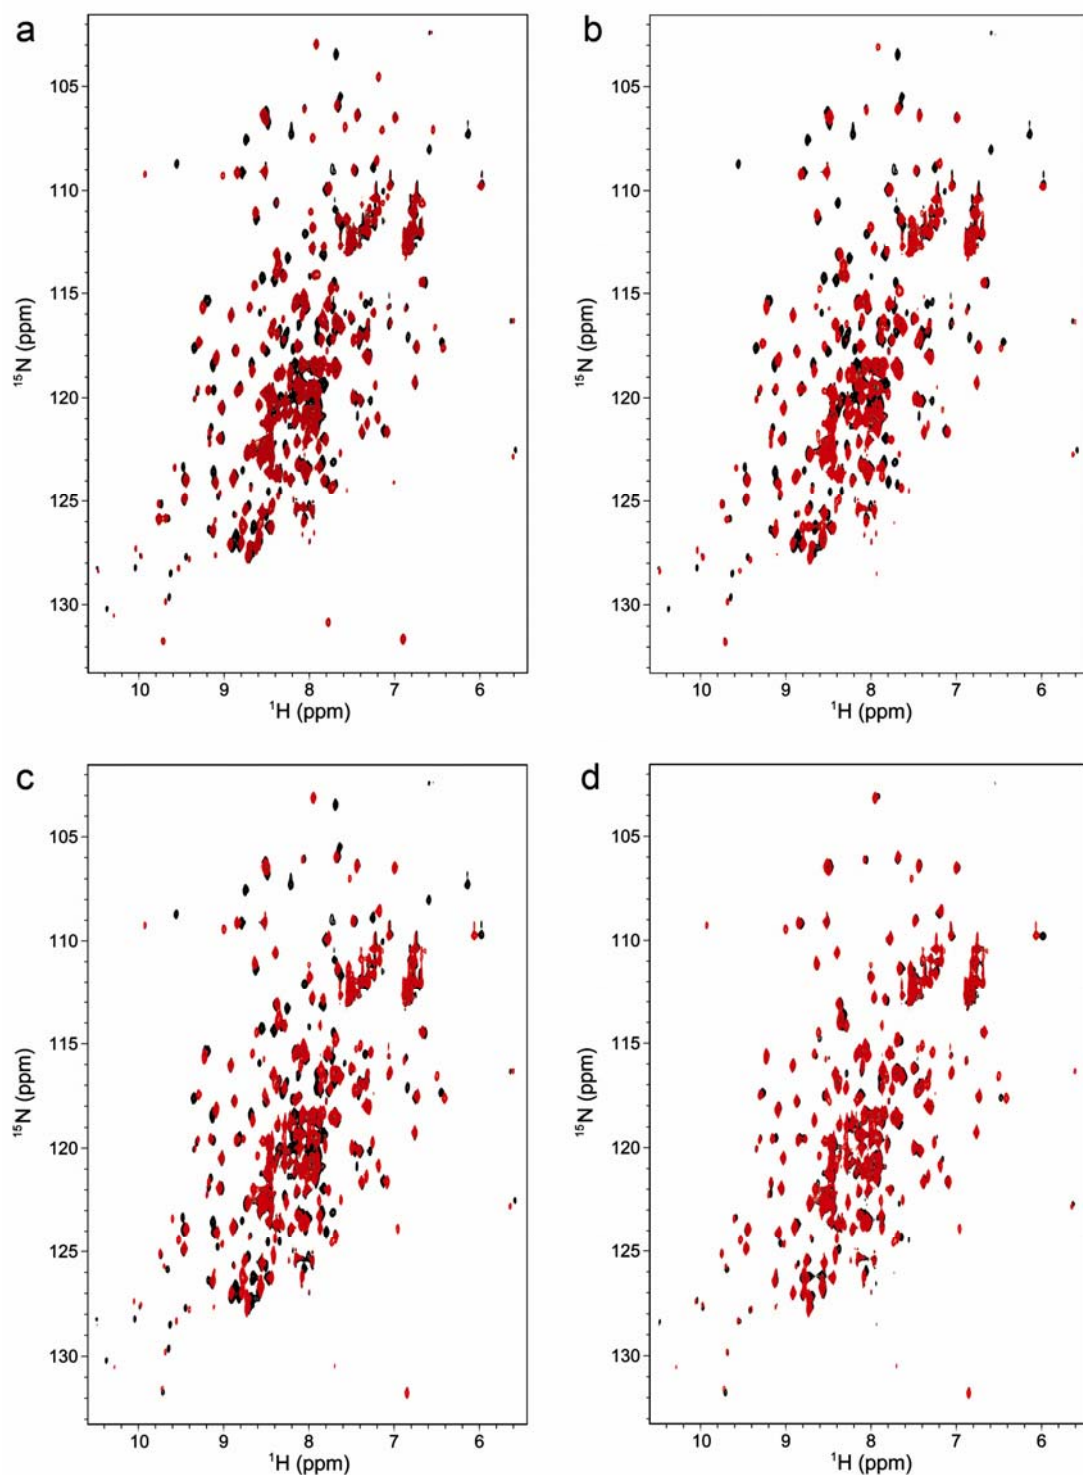

Figure S1. Superposition of [ $^1\text{H}$ ,  $^{15}\text{N}$ ] HSQC spectra for the N-terminal domain of Hsp90 in different states. (a) Apo form (black) and ADP-bound state (red). (b) Apo form (black) and AMPPCP-bound state (red). (c) Apo form (black) and AMPPNP-bound state (red). (d) AMPPCP-bound state (black) and AMPPNP-bound state (red).

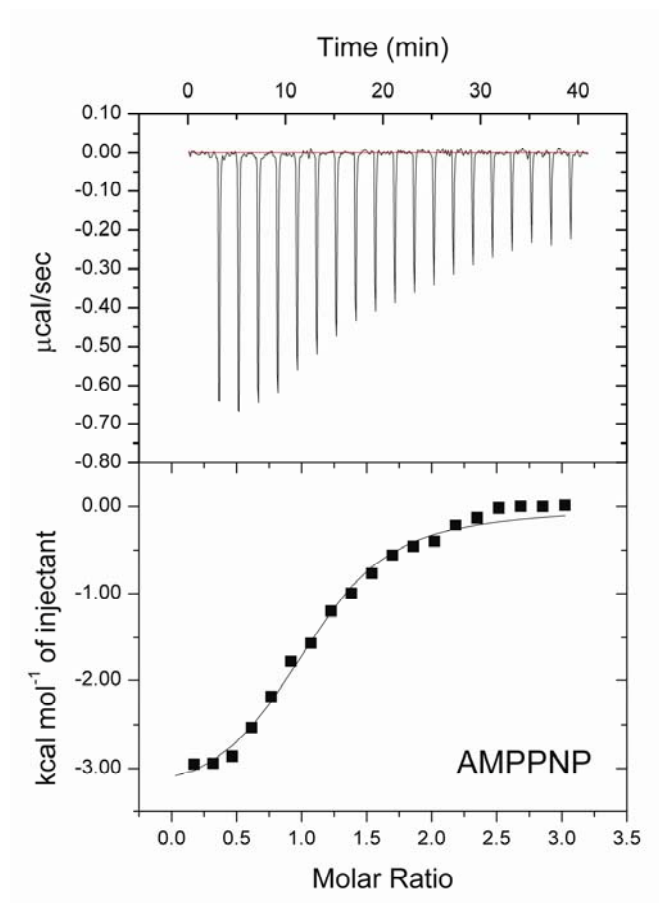

Figure S2. Isothermal titration calorimetry experiment was applied to determine the thermodynamic parameters for the binding of AMPPNP to Hsp90 N-terminal domain. The fitting thermodynamic parameters are summarized in Table 1.

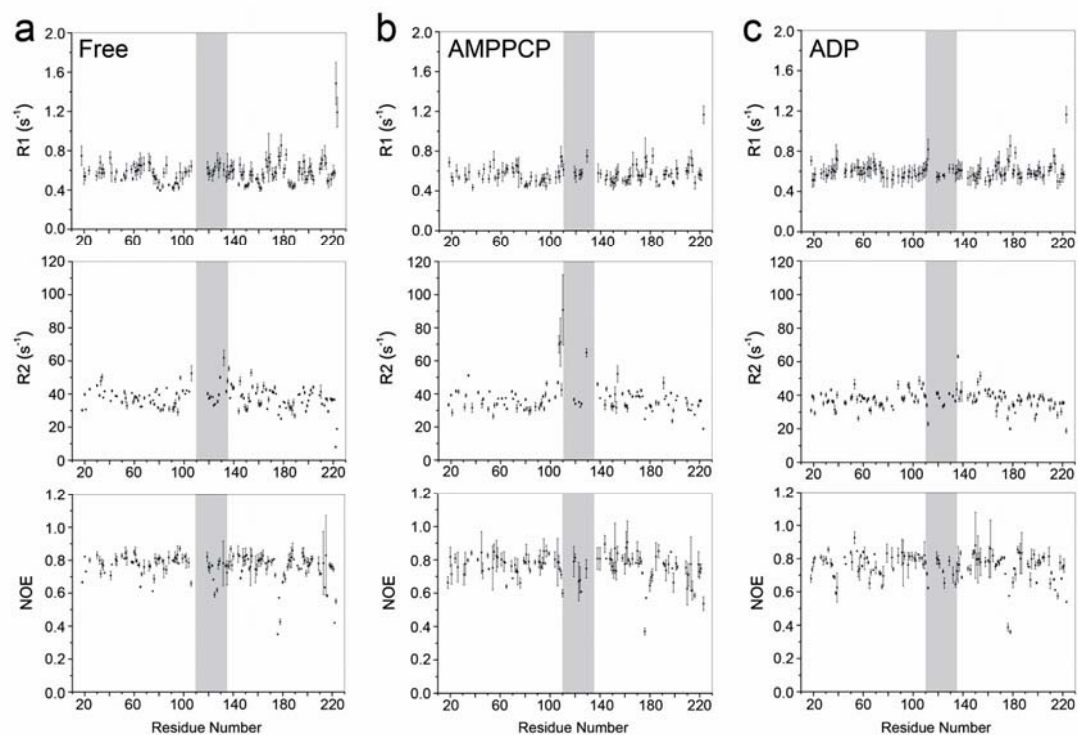

Figure S3.  $^{15}\text{N}$  longitudinal relaxation rates  $R_1$ , transverse relaxation rates  $R_2$  and  $\{^1\text{H}\}$ - $^{15}\text{N}$  heteronuclear steady NOEs of the N-terminal domain of Hsp90 in its (a) free, (b) AMPPCP- and (c) ADP-bound states. The lid segment (residues A111-G135) is highlighted in grey.

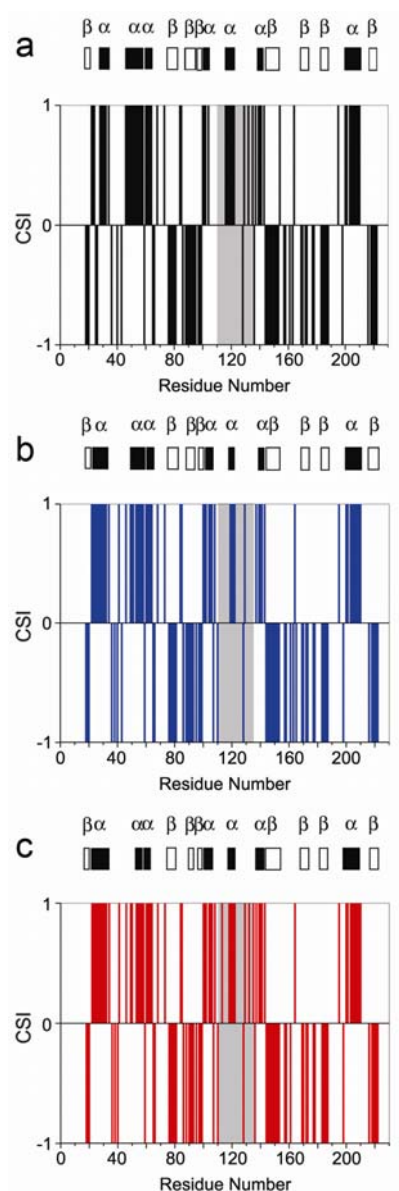

Figure S4. Chemical shift index (CSI) of the N-terminal domain of Hsp90 in its (a) free, (b) AMPPCP- and (c) ADP-bound states. The plot is derived from the consensus characterization of CA and CO. The lid segment (residues A111-G135) is highlighted in grey. The secondary structure elements are indicated on the top. Subtle differences between the solution structure of Hsp90 N-terminal domain and its crystal structure are revealed by the CSI data. In solution, residues I128-F134 locating in the lid segment do not form the  $\alpha$ -helix element which is observed in the crystal structures for the free (PDB ID: 3T0H), AMPPCP- (PDB ID: 3T10) or ADP- bound state (PDB ID: 1BYQ) of Hsp90. Residues E192-L198 are identified unstructured by CSI while a long  $\alpha$ -helix element extending from E192 to S211 is observed in all of the above mentioned three crystal structures. These differences strongly indicate that the existing crystal atomic coordinates are not suitable for the model-free analysis to disclose the dynamics behavior of Hsp90 in solution.

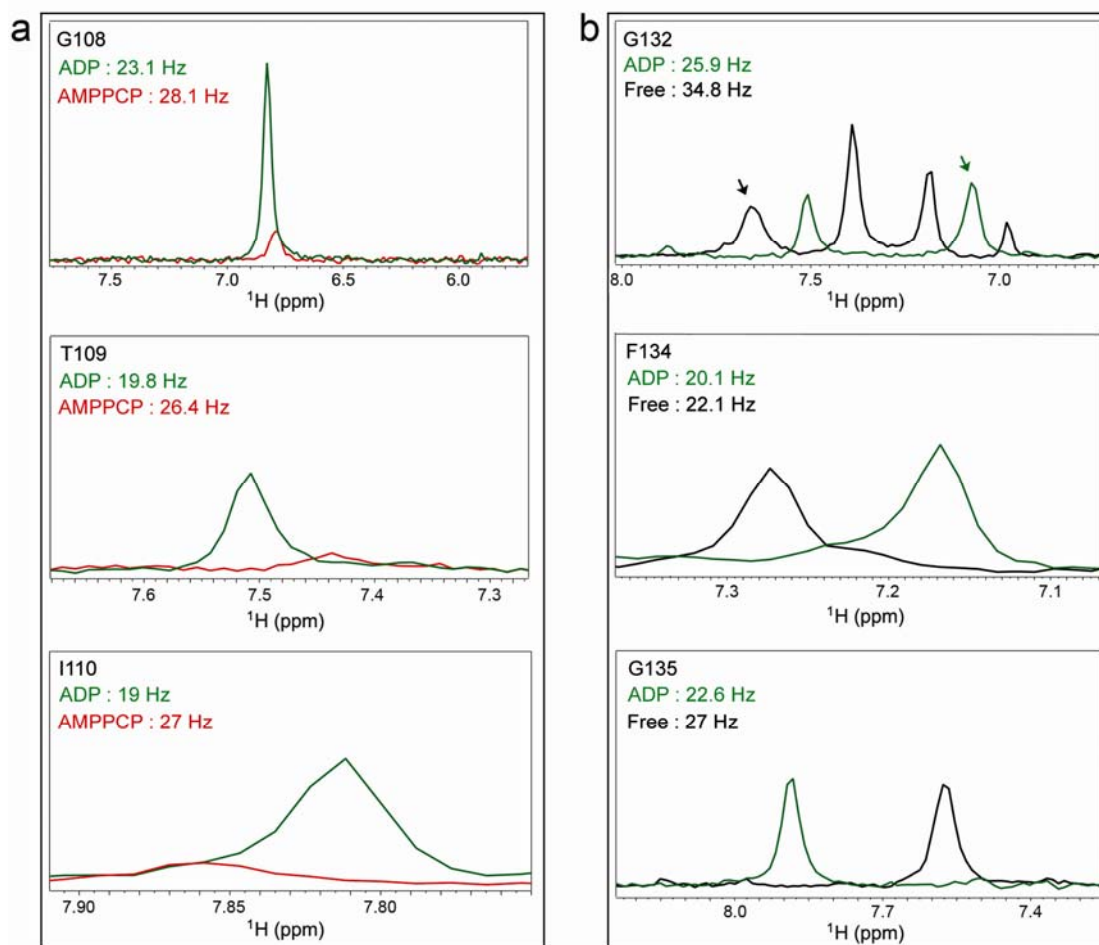

Figure S5. Line shape visualization for representative residues in (a) fragment L107-K112 or (b) fragment M130-A141 of the Hsp90 N-terminal domain in its free (black), AMPPCP- (red) and ADP-bound states (green). The linewidths at half-height of NMR signals for representative residues are labeled.

Table S1.  $^1\text{H}$  and  $^{15}\text{N}$  resonance assignments of the N-terminal domain of Hsp90 in its free and AMPPCP/ADP-bound states.

| Hsp90N<br>Sequence | Free               |                       | AMPPCP             |                       | ADP                |                       |
|--------------------|--------------------|-----------------------|--------------------|-----------------------|--------------------|-----------------------|
|                    | $\delta^1\text{H}$ | $\delta^{15}\text{N}$ | $\delta^1\text{H}$ | $\delta^{15}\text{N}$ | $\delta^1\text{H}$ | $\delta^{15}\text{N}$ |
| V17                |                    |                       | 8.074              | 120.985               | 8.062              | 120.91                |
| E18                | 8.47               | 126.258               | 8.447              | 126.263               | 8.438              | 126.322               |
| T19                | 7.988              | 118.676               | 7.949              | 118.404               | 7.94               | 118.379               |
| F20                | 8.719              | 125.268               | 8.751              | 125.455               | 8.746              | 125.479               |
| A21                | 8.285              | 122.304               | 8.273              | 122.629               | 8.263              | 122.601               |
| F22                | 7.692              | 118.462               | 7.68               | 118.756               | 7.675              | 118.648               |
| Q23                |                    |                       | 8.897              | 123.8                 | 8.902              | 123.99                |
| A24                | 8.864              | 126.657               | 8.807              | 126.024               | 8.795              | 126.098               |
| E25                |                    |                       | 7.73               | 113.66                | 7.939              | 114.121               |
| I26                | 7.285              | 120.163               | 7.333              | 121.327               | 7.317              | 121.286               |
| A27                | 8.209              | 121.386               |                    |                       |                    |                       |
| Q28                | 7.957              | 118.521               | 7.691              | 118.611               | 7.768              | 118.764               |
| L29                | 8.145              | 123.169               | 8.348              | 123.745               | 8.28               | 123.79                |
| M30                | 8.351              | 116.786               |                    |                       | 8.37               | 116.971               |
| S31                | 7.628              | 111.75                | 7.527              | 111.511               | 7.566              | 111.418               |
| L32                | 7.828              | 121.955               | 7.764              | 122.005               | 7.8                | 122.021               |
| I33                | 8.17               | 119.936               | 8.33               | 119.301               |                    |                       |
| I34                | 8.127              | 116.542               | 8.112              | 116.302               | 8.085              | 116.07                |
| N35                | 7.716              | 114.484               | 7.663              | 115.009               | 7.741              | 114.777               |
| T36                | 7.318              | 116.887               | 7.323              | 117.059               | 7.319              | 117.063               |
| F37                |                    |                       | 8.422              | 125.115               | 8.429              | 125.196               |
| Y38                |                    |                       | 6.879              | 123.736               | 7.008              | 124.113               |
| S39                |                    |                       | 8.579              | 116.877               | 8.605              | 117.102               |
| N40                |                    |                       | 8.337              | 119.668               | 8.403              | 120.034               |
| K41                | 7.906              | 117.102               | 7.854              | 116.279               | 7.827              | 116.128               |
| E42                | 8.408              | 114.367               | 8.346              | 114.093               | 8.383              | 114.017               |
| I43                | 6.821              | 112.217               | 6.828              | 112.082               | 6.756              | 111.563               |
| F44                | 7.984              | 120.641               | 7.963              | 120.448               |                    |                       |
| L45                | 5.585              | 122.512               | 5.639              | 122.745               | 5.609              | 122.871               |
| R46                | 6.452              | 117.348               | 6.486              | 117.685               | 6.433              | 117.688               |
| E47                | 7.712              | 116.827               | 7.633              | 116.527               | 7.634              | 116.518               |
| L48                | 7.877              | 119.417               |                    |                       |                    |                       |
| I49                | 8.237              | 120.125               |                    |                       |                    |                       |
| S50                | 8.26               | 116.819               | 8.287              | 116.486               | 8.307              | 116.291               |
| N51                | 7.895              | 120.423               | 7.232              | 119.511               | 7.223              | 119.42                |
| S52                | 8.386              | 120.701               |                    |                       |                    |                       |
| S53                | 8.582              | 115.934               |                    |                       |                    |                       |
| D54                | 8.2                | 119.436               | 8.557              | 119.671               | 8.534              | 119.896               |

|     |       |         |       |         |       |         |
|-----|-------|---------|-------|---------|-------|---------|
| A55 | 7.841 | 123.048 | 7.674 | 122.727 | 7.637 | 122.7   |
| L56 | 8.484 | 124.553 | 8.408 | 125.391 | 8.458 | 125.464 |
| D57 | 8.83  | 119.551 | 8.793 | 119.503 | 8.796 | 119.581 |
| K58 | 7.765 | 117.314 | 7.751 | 117.274 | 7.719 | 117.218 |
| I59 | 7.361 | 116.99  | 7.428 | 117.264 | 7.436 | 117.247 |
| R60 | 8.589 | 126.91  | 8.571 | 126.287 | 8.586 | 126.653 |
| Y61 | 8.686 | 118.401 | 8.67  | 118.746 | 8.669 | 118.753 |
| E62 | 8.097 | 119.288 | 8.159 | 119.354 | 8.16  | 119.366 |
| S63 | 8.318 | 114.15  | 8.29  | 114.22  | 8.291 | 114.224 |
| L64 | 7.378 | 121.709 | 7.385 | 121.691 | 7.384 | 121.686 |
| T65 | 7     | 106.528 | 6.995 | 106.559 | 6.994 | 106.59  |
| D66 | 7.312 | 118.138 | 7.326 | 118.001 | 7.332 | 118.029 |
| P67 |       |         |       |         |       |         |
| S68 | 8.065 | 115.202 | 8.063 | 115.149 | 8.069 | 115.139 |
| K69 | 7.85  | 123.257 | 7.876 | 123.331 | 7.877 | 123.344 |
| L70 | 7.223 | 111.7   | 7.227 | 111.497 | 7.229 | 111.505 |
| D71 | 8.025 | 123.384 | 8.045 | 123.629 | 8.042 | 123.622 |
| S72 | 7.462 | 109.077 | 7.479 | 109.074 | 7.48  | 109.064 |
| G73 | 7.66  | 111.443 | 7.657 | 111.424 | 7.654 | 111.409 |
| K74 | 8.924 | 127.139 | 8.919 | 127.039 | 8.923 | 127.108 |
| E75 | 7.637 | 116.571 | 7.63  | 116.709 | 7.627 | 116.777 |
| L76 | 8.67  | 127.263 | 8.703 | 127.186 | 8.696 | 127.256 |
| H77 | 7.666 | 118.845 | 7.666 | 118.486 | 7.69  | 118.703 |
| I78 | 8.178 | 117.582 | 8.16  | 117.686 | 8.148 | 117.613 |
| N79 | 9.742 | 125.169 | 9.754 | 125.135 | 9.763 | 125.171 |
| L80 | 9.026 | 121.965 | 9.046 | 121.999 | 9.044 | 121.975 |
| I81 | 9.354 | 120.075 | 9.346 | 120.063 | 9.339 | 120.056 |
| P82 |       |         |       |         |       |         |
| N83 | 9.154 | 121.469 | 9.17  | 121.723 | 9.168 | 121.695 |
| K84 | 9.468 | 124.919 | 9.458 | 124.905 | 9.458 | 124.9   |
| Q85 | 8.472 | 119.664 | 8.466 | 119.709 | 8.496 | 119.817 |
| D86 | 7.677 | 116.458 | 7.708 | 116.311 | 7.692 | 116.342 |
| R87 | 7.903 | 120.713 | 7.902 | 120.579 | 7.901 | 120.557 |
| T88 | 8.054 | 106.115 | 8.058 | 106.216 | 8.056 | 106.176 |
| L89 | 8.43  | 122.372 |       |         |       |         |
| T90 | 8.035 | 123.935 | 8.021 | 123.805 |       |         |
| I91 | 9.456 | 127.683 | 9.419 | 127.828 | 9.403 | 127.807 |
| V92 | 9.649 | 129.661 | 9.685 | 129.847 | 9.682 | 129.859 |
| D93 | 9.482 | 123.327 | 9.583 | 123.391 | 9.576 | 123.398 |
| T94 | 7.257 | 108.962 | 7.196 | 108.716 | 7.204 | 108.591 |
| G95 | 9.556 | 108.742 | 9.924 | 109.256 | 9.924 | 109.271 |
| I96 | 6.862 | 115.685 | 6.883 | 115.869 | 6.874 | 115.797 |
| G97 | 7.687 | 103.44  | 7.92  | 103.141 | 7.915 | 103.028 |
| M98 | 7.686 | 116.778 | 7.821 | 116.698 | 7.791 | 116.698 |



|                   |       |         |       |         |       |         |
|-------------------|-------|---------|-------|---------|-------|---------|
| T99               | 8.051 | 112.145 | 8.011 | 111.799 | 7.96  | 111.84  |
| K100              | 8.622 | 121.245 |       |         |       |         |
| A101              | 7.899 | 116.498 | 7.873 | 116.527 | 7.855 | 116.327 |
| D102              | 7.425 | 117.387 | 7.466 | 117.264 | 7.482 | 117.315 |
| L103              |       |         |       |         |       |         |
| I104              | 7.581 | 115.949 | 7.383 | 115.177 | 7.394 | 115.149 |
| N105              | 8.304 | 117.365 | 8.427 | 116.451 | 8.443 | 116.833 |
| N106              | 8.793 | 116.117 | 8.647 | 115.659 | 8.696 | 115.698 |
| L107              |       |         | 7.162 | 120.59  | 7.193 | 121.004 |
| G108              |       |         | 6.855 | 132.127 | 6.9   | 131.638 |
| T109              |       |         | 7.512 | 107.318 | 7.583 | 107.012 |
| I110              |       |         | 7.894 | 122.749 | 7.887 | 122.433 |
| A111 <sup>a</sup> |       |         | 8.575 | 126.728 | 8.612 | 127.179 |
| K112              |       |         | 8.682 | 122.088 | 8.661 | 122.497 |
| S113              |       |         |       |         |       |         |
| G114              | 8.795 | 110.061 |       |         | 9.013 | 109.375 |
| T115              |       |         |       |         |       |         |
| K116              |       |         |       |         |       |         |
| A117              | 7.922 | 120.579 |       |         |       |         |
| F118              | 8.341 | 120.067 |       |         |       |         |
| M119              | 7.863 | 117.299 | 7.886 | 117.18  | 7.854 | 117.246 |
| E120              | 8.103 | 118.587 | 8.059 | 118.361 | 8.089 | 118.375 |
| A121              | 7.797 | 124.045 | 7.877 | 123.806 | 7.826 | 123.997 |
| L122              | 8.337 | 120.263 |       |         | 8.439 | 119.791 |
| Q123              | 7.83  | 119.468 | 7.911 | 119.572 | 7.926 | 119.824 |
| A124              | 7.4   | 120.172 | 7.431 | 120.19  | 7.402 | 120.154 |
| G125              | 7.666 | 106.002 | 7.69  | 106.128 | 7.676 | 105.982 |
| A126              | 8.118 | 123.077 | 8.126 | 123.222 | 8.137 | 123.24  |
| D127              | 8.198 | 118.476 | 8.306 | 119.09  | 8.368 | 118.985 |
| I128              | 7.723 | 123.117 | 7.837 | 124.861 | 7.77  | 124.53  |
| S129              | 8.556 | 114.268 | 8.611 | 114.811 | 8.645 | 114.663 |
| M130              | 7.995 | 120.138 |       |         | 8.114 | 119.432 |
| I131              | 7.83  | 119.395 |       |         | 7.906 | 119.812 |
| G132              | 7.725 | 109.069 |       |         | 7.145 | 107.147 |
| Q133              | 7.993 | 120.204 |       |         | 7.95  | 119.505 |
| F134              | 7.346 | 115.534 |       |         | 7.242 | 115.984 |
| G135              | 7.651 | 105.585 |       |         | 7.961 | 107.53  |
| V136              | 6.595 | 108.057 |       |         | 6.549 | 107.15  |
| G137              | 8.746 | 107.562 |       |         | 7.186 | 104.598 |
| F138              | 9.126 | 123.546 | 9.674 | 124.177 | 9.76  | 125.914 |
| Y139              | 7.144 | 110.078 |       |         | 7.082 | 110.369 |
| S140              | 7.999 | 114.248 | 7.857 | 114.273 | 7.897 | 114.15  |
| A141              | 8.002 | 125.259 |       |         | 8.077 | 125.329 |
| Y142              | 7.405 | 111.945 | 7.487 | 112.05  | 7.484 | 111.987 |

|      |        |         |        |         |        |         |
|------|--------|---------|--------|---------|--------|---------|
| L143 | 8.06   | 118.517 | 8.081  | 118.721 | 8.06   | 118.461 |
| V144 | 6.597  | 102.508 | 6.545  | 102.534 | 6.562  | 102.475 |
| A145 | 7.691  | 124.185 | 7.647  | 124.315 | 7.722  | 124.309 |
| E146 | 8.524  | 117.845 | 8.491  | 117.296 | 8.537  | 117.62  |
| K147 | 7.416  | 116.914 | 7.38   | 117.043 | 7.414  | 117.092 |
| V148 | 8.056  | 125.672 | 8.061  | 125.933 | 8.066  | 126.024 |
| T149 | 9.087  | 124.768 | 8.996  | 124.641 | 9.046  | 124.659 |
| V150 | 10.486 | 128.178 | 10.484 | 128.435 | 10.473 | 128.422 |
| I151 | 9.63   | 128.498 | 9.54   | 128.387 | 9.531  | 128.27  |
| T152 | 9.17   | 121.893 | 9.178  | 122.219 | 9.166  | 122.241 |
| K153 | 8.903  | 127.159 | 9.106  | 127.567 | 9.1    | 127.645 |
| H154 | 9.707  | 131.784 |        |         | 9.708  | 131.738 |
| N155 | 9.647  | 125.919 |        |         |        |         |
| D156 |        |         |        |         |        |         |
| D157 |        |         |        |         |        |         |
| E158 | 9.348  | 117.604 | 9.271  | 117.447 | 9.294  | 117.407 |
| Q159 | 8.15   | 119.433 | 8.125  | 119.285 | 8.139  | 119.414 |
| Y160 | 8.682  | 124.265 | 8.693  | 124.444 | 8.685  | 124.41  |
| A161 | 9.316  | 119.709 | 9.301  | 119.59  | 9.305  | 119.628 |
| W162 | 10.38  | 130.215 | 10.279 | 130.434 | 10.29  | 130.54  |
| E163 | 8.656  | 126.12  | 8.749  | 126.332 | 8.769  | 126.374 |
| S164 | 8.262  | 113.321 | 8.329  | 113.697 | 8.351  | 113.707 |
| S165 |        |         | 9.525  | 130.756 |        |         |
| A166 | 9.122  | 119.645 | 9.118  | 119.558 | 9.183  | 119.665 |
| G167 | 8.487  | 106.773 | 8.496  | 106.497 | 8.501  | 106.688 |
| G168 | 8.51   | 106.283 | 8.49   | 106.383 | 8.534  | 106.401 |
| S169 | 7.794  | 115.569 | 7.791  | 115.516 | 7.786  | 115.62  |
| F170 | 8.817  | 119.446 | 8.851  | 119.59  | 8.847  | 119.724 |
| T171 | 8.791  | 109.185 | 8.824  | 109.228 | 8.844  | 109.198 |
| V172 | 8.874  | 117.79  | 8.866  | 117.845 | 8.856  | 117.78  |
| R173 | 9.109  | 124.067 | 9.086  | 124.159 | 9.092  | 124.125 |
| T174 | 9.128  | 118.401 | 9.083  | 118.19  | 9.083  | 118.114 |
| D175 | 8.652  | 126.346 |        |         |        |         |
| T176 | 8.043  | 115.77  | 8.046  | 115.67  | 8.041  | 115.636 |
| G177 | 7.802  | 109.992 | 7.779  | 109.988 | 7.768  | 109.971 |
| E178 | 8.282  | 120.812 | 8.283  | 120.865 | 8.279  | 120.835 |
| P179 |        |         |        |         |        |         |
| M180 | 9.469  | 123.926 | 9.451  | 123.94  | 9.44   | 123.958 |
| G181 | 8.628  | 111.4   | 8.636  | 111.191 | 8.63   | 111.125 |
| R182 | 7.461  | 120.045 | 7.492  | 120.037 | 7.488  | 119.976 |
| G183 | 9.202  | 115.684 | 9.227  | 115.797 | 9.235  | 115.754 |
| T184 | 7.738  | 115.809 | 7.649  | 114.675 | 7.673  | 114.775 |
| K185 | 10.039 | 128.204 | 10.039 | 127.375 | 10.032 | 127.319 |
| V186 | 9.173  | 126.421 | 9.111  | 126.063 | 9.105  | 125.957 |

|      |       |         |       |         |       |         |
|------|-------|---------|-------|---------|-------|---------|
| I187 | 9.989 | 127.677 | 9.974 | 127.729 | 9.968 | 127.685 |
| L188 | 8.885 | 125.66  |       |         |       |         |
| H189 | 8.343 | 124.732 |       |         |       |         |
| L190 | 8.021 | 123.233 | 8.072 | 123.483 |       |         |
| K191 | 8.456 | 120.34  | 8.447 | 120.461 |       |         |
| E192 | 9.023 | 120.497 | 9.027 | 120.544 | 9.027 | 120.507 |
| D193 | 8.382 | 113.123 | 8.365 | 113.098 | 8.384 | 113.146 |
| Q194 | 7.863 | 118.707 | 7.872 | 118.473 | 7.87  | 118.488 |
| T195 | 7.435 | 106.395 | 7.436 | 106.473 | 7.441 | 106.457 |
| E196 | 8.872 | 123.8   | 8.891 | 123.828 | 8.885 | 123.765 |
| Y197 | 6.644 | 114.509 | 6.672 | 114.508 | 6.665 | 114.495 |
| L198 | 7.281 | 111.091 | 7.297 | 110.916 | 7.301 | 110.917 |
| E199 | 7.309 | 116.444 | 7.313 | 116.469 | 7.311 | 116.459 |
| E200 | 9.126 | 126.51  | 9.12  | 126.427 | 9.124 | 126.443 |
| R201 | 8.917 | 116.056 | 8.914 | 116.095 | 8.914 | 116.091 |
| R202 | 6.762 | 119.292 | 6.764 | 119.285 | 6.761 | 119.28  |
| I203 | 8.12  | 117.574 | 8.128 | 117.546 | 8.12  | 117.596 |
| K204 | 8.433 | 116.542 | 8.397 | 116.328 | 8.411 | 116.439 |
| E205 | 7.708 | 118.435 | 7.711 | 118.585 | 7.733 | 118.526 |
| I206 | 7.894 | 121.008 | 7.902 | 120.926 | 7.92  | 120.953 |
| V207 | 8.374 | 120.626 | 8.407 | 120.986 | 8.443 | 121.416 |
| K208 | 7.874 | 118.861 | 7.833 | 118.374 | 7.83  | 118.367 |
| K209 | 7.511 | 116.225 | 7.499 | 116.206 | 7.52  | 116.165 |
| H210 | 7.837 | 113.171 | 7.814 | 112.975 | 7.825 | 112.771 |
| S211 | 8.172 | 115.42  | 8.169 | 115.705 | 8.176 | 115.683 |
| Q212 | 8.151 | 120.009 | 8.117 | 120.03  | 8.097 | 120.022 |
| F213 | 8.172 | 115.358 | 8.172 | 115.384 | 8.143 | 115.328 |
| I214 | 7.127 | 121.591 | 7.102 | 121.629 | 7.085 | 121.666 |
| G215 | 9.259 | 115.82  | 9.23  | 115.67  | 9.274 | 115.802 |
| Y216 | 6.751 | 117.611 | 6.733 | 117.604 | 6.734 | 117.608 |
| P217 |       |         |       |         |       |         |
| I218 | 8.092 | 123.304 | 8.103 | 123.545 | 8.066 | 123.495 |
| T219 | 8.742 | 122.741 | 8.723 | 122.76  | 8.725 | 122.731 |
| L220 | 8.711 | 127.616 | 8.72  | 127.694 | 8.716 | 127.713 |
| F221 | 8.825 | 127.2   | 8.797 | 127.085 | 8.796 | 127.04  |
| V222 | 7.938 | 121.443 | 7.92  | 121.55  | 7.939 | 121.427 |
| E223 | 8.562 | 125.506 | 8.553 | 125.553 | 8.55  | 125.627 |

<sup>a</sup> The lid region (residues A111-G135) is highlighted in grey.
